# Supplementary material for: In silico modeling of the effects of alpha-synuclein oligomerization on dopaminergic neuronal homeostasis
Source: PubMed Central journal article supplement (PMC4062111; doi:10.1186/1752-0509-8-54), 2014-05-13

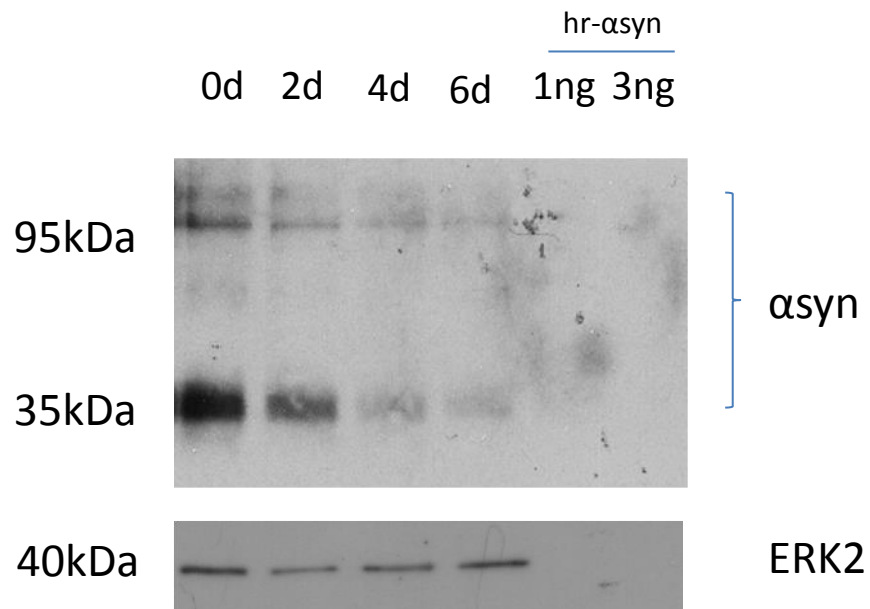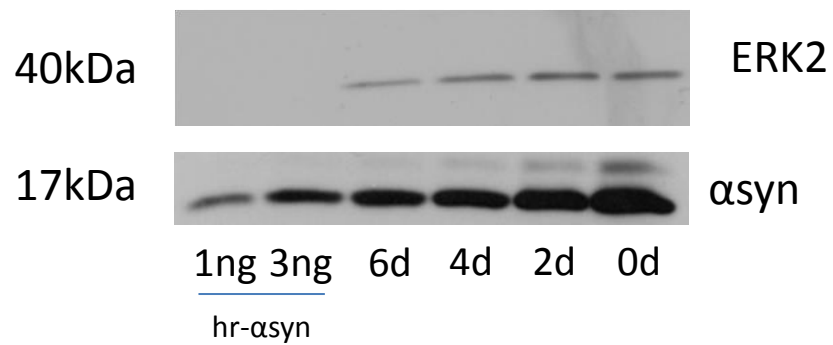

Supplement: 1752-0509-8-54-S3.pdf [file 1752-0509-8-54-S3.pdf]
