# Supplementary material for: In silico modeling of the effects of alpha-synuclein oligomerization on dopaminergic neuronal homeostasis
Source: PubMed Central journal article supplement (PMC4062111; doi:10.1186/1752-0509-8-54), 2014-05-13
Supplement: 1752-0509-8-54-S4.pdf [file 1752-0509-8-54-S4.pdf]

**Table 1: List of biomolecular reactions and parameters categorized per model compartment. The last column provides the parameter groups as described in the section ‘Model development’.**

| Description                                            | Name                  | Reaction                                               | Parameter                  | Parameter group    |
|--------------------------------------------------------|-----------------------|--------------------------------------------------------|----------------------------|--------------------|
| <b>ASYN &amp; Dopamine production and modification</b> |                       |                                                        |                            |                    |
| WT ASYN production                                     | WTasynSynthesis       | SOURCE -> WTasyn{Cytosol}                              | $k_{WTasynSynth}$          |                    |
| Dopamine production                                    | DopProduction         | SOURCE -> Dopamine                                     | $k_{DopProd}$              |                    |
| WT ASYN modification from Dopamine                     | WTasynDopModification | WTasyn{Cytosol} + Dopamine -> DopModWTasyn{Cytosol}    | $k_{WTasynDopMod}$         |                    |
| Dopamine degradation                                   | DopamineDegr          | Dopamine -> Dopamine_degraded                          | $k_{DopDegr}$              |                    |
| <b>ASYN oligomerization</b>                            |                       |                                                        |                            |                    |
| WT ASYN Dimer formation                                | 2merForm              | 2 * WTasyn{Cytosol} -> WTasyn2{Cytosol}                | $k_{WTasyn2merForm}$       | $k_{2merForm}$     |
| Formation of modified ASYN Dimer                       | DopMod2merForm        | 2 * DopModWTasyn{Cytosol} -> DopModWTasyn2{Cytosol}    | $k_{DopModWTasyn2merForm}$ | $k_{2merForm}$     |
| WT ASYN 3mer formation                                 | 3merForm              | WTasyn2{Cytosol} + WTasyn{Cytosol} -> WTasyn3{Cytosol} | $k_{WTasyn3merForm}$       | $k_{OligomerForm}$ |
| WT ASYN 4mer formation                                 | 4merForm              | WTasyn3{Cytosol} + WTasyn{Cytosol} -> WTasyn4{Cytosol} | $k_{WTasyn4merForm}$       | $k_{OligomerForm}$ |
| WT ASYN 5mer formation                                 | 5merForm              | WTasyn4{Cytosol} + WTasyn{Cytosol} -> WTasyn5{Cytosol} | $k_{WTasyn5merForm}$       | $k_{OligomerForm}$ |

|                                 |                |                                                                          |                            |                    |
|---------------------------------|----------------|--------------------------------------------------------------------------|----------------------------|--------------------|
| WT ASYN 6mer formation          | 6merForm       | WTasyn5{Cytosol} + WTasyn{Cytosol} -> WTasyn6{Cytosol}                   | $k_{WTasyn6merForm}$       | $k_{OligomerForm}$ |
| WT ASYN 7mer formation          | 7merForm       | WTasyn6{Cytosol} + WTasyn{Cytosol} -> WTasyn7{Cytosol}                   | $k_{WTasyn7merForm}$       | $k_{OligomerForm}$ |
| WT ASYN 8mer formation          | 8merForm       | WTasyn7{Cytosol} + WTasyn{Cytosol} -> WTasyn8{Cytosol}                   | $k_{WTasyn8merForm}$       | $k_{OligomerForm}$ |
| WT ASYN 9mer formation          | 9merForm       | WTasyn8{Cytosol} + WTasyn{Cytosol} -> WTasyn9                            | $k_{WTasyn9merForm}$       | $k_{OligomerForm}$ |
| Formation of modified ASYN 3mer | DopMod3merForm | DopModWTasyn2{Cytosol} + DopModWTasyn{Cytosol} -> DopModWTasyn3{Cytosol} | $k_{DopModWTasyn3merForm}$ | $k_{OligomerForm}$ |
| Formation of modified ASYN 4mer | DopMod4merForm | DopModWTasyn3{Cytosol} + DopModWTasyn{Cytosol} -> DopModWTasyn4{Cytosol} | $k_{DopModWTasyn4merForm}$ | $k_{OligomerForm}$ |
| Formation of modified ASYN 5mer | DopMod5merForm | DopModWTasyn4{Cytosol} + DopModWTasyn{Cytosol} -> DopModWTasyn5{Cytosol} | $k_{DopModWTasyn5merForm}$ | $k_{OligomerForm}$ |
| Formation of modified ASYN 6mer | DopMod6merForm | DopModWTasyn5{Cytosol} + DopModWTasyn{Cytosol} -> DopModWTasyn6{Cytosol} | $k_{DopModWTasyn6merForm}$ | $k_{OligomerForm}$ |
| Formation of modified ASYN 7mer | DopMod7merForm | DopModWTasyn6{Cytosol} + DopModWTasyn{Cytosol} -> DopModWTasyn7{Cytosol} | $k_{DopModWTasyn7merForm}$ | $k_{OligomerForm}$ |
| Formation of modified ASYN      | DopMod8merForm | DopModWTasyn7{Cytosol} +                                                 | $k_{DopModWTasyn8merForm}$ | $k_{OligomerForm}$ |

|                                 |                |                                                                       |                            |                    |
|---------------------------------|----------------|-----------------------------------------------------------------------|----------------------------|--------------------|
| 8mer                            |                | DopModWTasyn{Cytosol} -> DopModWTasyn8{Cytosol}                       |                            |                    |
| Formation of modified ASYN 9mer | DopMod9merForm | DopModWTasyn8{Cytosol} + DopModWTasyn{Cytosol} -> DopModWTasyn9       | $k_{DopModWTasyn9merForm}$ | $k_{OligomerForm}$ |
| Aggregate Formation             | AggregForm     | WTasyn9 + WTasyn{Cytosol} -> HigherWTasynSPC + WTasynInHigher         | $k_{AggrForm}$             | $k_{OligomerForm}$ |
| Aggregate growth                | AggregGrowth   | HigherWTasynSPC + WTasyn{Cytosol} -> HigherWTasynSPC + WTasynInHigher | $k_{AggrGrowth}$           |                    |
| WT asyn Dimer disassociation    | 2merDis        | WTasyn2{Cytosol} -> 2 * WTasyn{Cytosol}                               | $k_{WTasyn2merDis}$        | $k_{DisRate}$      |
| WT asyn 3mer disassociation     | 3merDis        | WTasyn3{Cytosol} -> WTasyn2{Cytosol} + WTasyn{Cytosol}                | $k_{WTasyn3merDis}$        | $k_{DisRate}$      |
| WT asyn 4mer disassociation     | 4merDis        | WTasyn4{Cytosol} -> WTasyn3{Cytosol} + WTasyn{Cytosol}                | $k_{WTasyn4merDis}$        | $k_{DisRate}$      |
| WT asyn 5mer disassociation     | 5merDis        | WTasyn5{Cytosol} -> WTasyn4{Cytosol} + WTasyn{Cytosol}                | $k_{WTasyn5merDis}$        | $k_{DisRate}$      |
| WT asyn 6mer disassociation     | 6merDis        | WTasyn6{Cytosol} -> WTasyn5{Cytosol} + WTasyn{Cytosol}                | $k_{WTasyn6merDis}$        | $k_{DisRate}$      |
| WT asyn 7mer disassociation     | 7merDis        | WTasyn7{Cytosol} -> WTasyn6{Cytosol} + WTasyn{Cytosol}                | $k_{WTasyn7merDis}$        | $k_{DisRate}$      |
| WT asyn 8mer disassociation     | 8merDis        | WTasyn8{Cytosol} -> WTasyn7{Cytosol} + WTasyn{Cytosol}                | $k_{WTasyn8merDis}$        | $k_{DisRate}$      |

|                                       |               |                                                                          |                           |               |
|---------------------------------------|---------------|--------------------------------------------------------------------------|---------------------------|---------------|
| WT asyn 9mer disassociation           | 9merDis       | WTasyn9 -> WTasyn8{Cytosol} + WTasyn{Cytosol}                            | $k_{WTasyn9merDis}$       | $k_{DisRate}$ |
| Disassociation of modified ASYN Dimer | DopMod2merDis | DopModWTasyn2{Cytosol} -> 2 * DopModWTasyn{Cytosol}                      | $k_{DopModWTasyn2merDis}$ | $k_{DisRate}$ |
| Disassociation of modified ASYN 3mer  | DopMod3merDis | DopModWTasyn3{Cytosol} -> DopModWTasyn2{Cytosol} + DopModWTasyn{Cytosol} | $k_{DopModWTasyn3merDis}$ | $k_{DisRate}$ |
| Disassociation of modified ASYN 4mer  | DopMod4merDis | DopModWTasyn4{Cytosol} -> DopModWTasyn3{Cytosol} + DopModWTasyn{Cytosol} | $k_{DopModWTasyn4merDis}$ | $k_{DisRate}$ |
| Disassociation of modified ASYN 5mer  | DopMod5merDis | DopModWTasyn5{Cytosol} -> DopModWTasyn4{Cytosol} + DopModWTasyn{Cytosol} | $k_{DopModWTasyn5merDis}$ | $k_{DisRate}$ |
| Disassociation of modified ASYN 6mer  | DopMod6merDis | DopModWTasyn6{Cytosol} -> DopModWTasyn5{Cytosol} + DopModWTasyn{Cytosol} | $k_{DopModWTasyn6merDis}$ | $k_{DisRate}$ |
| Disassociation of modified ASYN 7mer  | DopMod7merDis | DopModWTasyn7{Cytosol} -> DopModWTasyn6{Cytosol} + DopModWTasyn{Cytosol} | $k_{DopModWTasyn7merDis}$ | $k_{DisRate}$ |
| Disassociation of modified ASYN 8mer  | DopMod8merDis | DopModWTasyn8{Cytosol} -> DopModWTasyn7{Cytosol} + DopModWTasyn{Cytosol} | $k_{DopModWTasyn8merDis}$ | $k_{DisRate}$ |
| Disassociation of modified ASYN 9mer  | DopMod9merDis | DopModWTasyn9 -> DopModWTasyn8{Cytosol} + DopModWTasyn{Cytosol}          | $k_{DopModWTasyn9merDis}$ | $k_{DisRate}$ |

| <b>CMA component</b>                   |                      |                                               |                           |                               |
|----------------------------------------|----------------------|-----------------------------------------------|---------------------------|-------------------------------|
| Binding of WT ASYN Monomer with Lamp2a | WTasynLampBind       | WTasyn{Cytosol} + Lamp2a -> WTasyndegr        | $k_{WTasynLampBind}$      | $k_{WTasyn1\_2merBindOnLamp}$ |
| Binding of WT ASYN Dimer with Lamp2a   | WTasyn2LampBind      | WTasyn2{Cytosol} + Lamp2a -> WTasyn2degr      | $k_{WTasyn2merLampBind}$  | $k_{WTasyn1\_2merBindOnLamp}$ |
| Binding of WT ASYN 3mer on Lamp2a      | WTasyn3merBindOnLamp | Lamp2a + WTasyn3{Cytosol} -> WTasyn3merOnLamp | $k_{WTasynr3merLampBind}$ | $k_{WToligoBindOnLamp}$       |
| Binding of WT ASYN 4mer on Lamp2a      | WTasyn4merBindOnLamp | Lamp2a + WTasyn4{Cytosol} -> WTasyn4merOnLamp | $k_{WTasynr4merLampBind}$ | $k_{WToligoBindOnLamp}$       |
| Binding of WT ASYN 5mer with Lamp2a    | WTasyn5merBindOnLamp | WTasyn5{Cytosol} + Lamp2a -> WTasyn5merOnLamp | $k_{WTasynr5merLampBind}$ | $k_{WToligoBindOnLamp}$       |
| Binding of WT ASYN 6mer on Lamp2a      | WTasyn6merBindOnLamp | Lamp2a + WTasyn6{Cytosol} -> WTasyn6merOnLamp | $k_{WTasynr6merLampBind}$ | $k_{WToligoBindOnLamp}$       |
| Binding of WT ASYN 7mer with Lamp2a    | WTasyn7merBindOnLamp | WTasyn7{Cytosol} + Lamp2a -> WTasyn7merOnLamp | $k_{WTasynr7merLampBind}$ | $k_{WToligoBindOnLamp}$       |
| Binding of WT ASYN 8mer on Lamp2a      | WTasyn8merBindOnLamp | WTasyn8merOnLamp + WTasyn8{Cytosol} -> Lamp2a | $k_{WTasynr8merLampBind}$ | $k_{WToligoBindOnLamp}$       |
| Binding of WT ASYN 9mer with Lamp2a    | WTasyn9merBindOnLamp | WTasyn9 + Lamp2a -> WTasyn9merOnLamp          | $k_{WTasynr9merLampBind}$ | $k_{WToligoBindOnLamp}$       |
| WT ASYN Monomer uptake from lysosome   | WTasynLysosUptake    | WTasyndegr -> Lamp2a + WTasyn{Lysosome}       | $k_{WTasynLysUptk}$       |                               |
| WT ASYN Dimer uptake from lysosome     | WTasyn2LysosUptake   | WTasyn2degr -> Lamp2a + WTasyn2{Lysosome}     | $k_{WTasyn2LysUptk}$      |                               |

|                                             |                      |                                                        |                          |                      |
|---------------------------------------------|----------------------|--------------------------------------------------------|--------------------------|----------------------|
| WT ASYN Monomer degradation in the lysosome | WTasyn1merCMADegr    | WTasyn{Lysosome} -> WTasynCMADegr                      | $k_{WTasynLysDegr}$      |                      |
| WT ASYN Dimer degradation in the lysosome   | WTasyn2merCMADegr    | WTasyn2{Lysosome} -> WTasyn2merCMADegr                 | $k_{WTasyn2merLysDegr}$  |                      |
| Release of WT ASYN 3mer from lamp2a         | LampFree3merWT       | WTasyn3merOnLamp -> WTasyn3{Cytosol} + Lamp2a          | $k_{WTasyn3merLampFree}$ | $k_{LampFreeWTasyn}$ |
| Release of WT ASYN 4mer from lamp2a         | LampFree4merWT       | WTasyn4merOnLamp -> WTasyn4{Cytosol} + Lamp2a          | $k_{WTasyn4merLampFree}$ | $k_{LampFreeWTasyn}$ |
| Release of WT ASYN 5mer from lamp2a         | LampFree5merWT       | WTasyn5merOnLamp -> WTasyn5{Cytosol} + Lamp2a          | $k_{WTasyn5merLampFree}$ | $k_{LampFreeWTasyn}$ |
| Release of WT ASYN 6mer from lamp2a         | LampFree6merWT       | WTasyn6merOnLamp -> WTasyn6{Cytosol} + Lamp2a          | $k_{WTasyn6merLampFree}$ | $k_{LampFreeWTasyn}$ |
| Release of WT ASYN 7mer from lamp2a         | LampFree7merWT       | WTasyn7merOnLamp -> WTasyn7{Cytosol} + Lamp2a          | $k_{WTasyn7merLampFree}$ | $k_{LampFreeWTasyn}$ |
| Release of WT ASYN 8mer from lamp2a         | LampFree8merWT       | WTasyn8merOnLamp -> WTasyn8{Cytosol} + Lamp2a          | $k_{WTasyn8merLampFree}$ | $k_{LampFreeWTasyn}$ |
| Release of WT ASYN 9mer from lamp2a         | LampFree9merWT       | WTasyn9merOnLamp -> WTasyn9 + Lamp2a                   | $k_{WTasyn9merLampFree}$ | $k_{LampFreeWTasyn}$ |
| Formation of WT ASYN Dimer on Lamp2a        | WTasyn2merFormOnLamp | WTasyn{Cytosol} + WTasyndegr -> WTasyn2degr            | $k_{WTasyn2merLampForm}$ | $k_{2merForm}$       |
| Formation of WT ASYN 3mer on Lamp2a         | WTasyn3merFormOnLamp | WTasyn{Cytosol} + WTasyn2merOnLamp -> WTasyn3merOnLamp | $k_{WTasyn3merLampForm}$ | $k_{OligomerForm}$   |

|                                                            |                           |                                                        |                                |                    |
|------------------------------------------------------------|---------------------------|--------------------------------------------------------|--------------------------------|--------------------|
| Formation of WT ASYN 4mer on Lamp2a                        | WTasyn4merFormOnLamp      | WTasyn{Cytosol} + WTasyn3merOnLamp -> WTasyn4merOnLamp | $k_{WTasyn4merLampForm}$       | $k_{OligomerForm}$ |
| Formation of WT ASYN 5mer on Lamp2a                        | WTasyn5merFormOnLamp      | WTasyn{Cytosol} + WTasyn4merOnLamp -> WTasyn5merOnLamp | $k_{WTasyn5merLampForm}$       | $k_{OligomerForm}$ |
| Formation of WT ASYN 6mer on Lamp2a                        | WTasyn6merFormOnLamp      | WTasyn5merOnLamp + WTasyn{Cytosol} -> WTasyn6merOnLamp | $k_{WTasyn6merLampForm}$       | $k_{OligomerForm}$ |
| Formation of WT ASYN 7mer on Lamp2a                        | WTasyn7merFormOnLamp      | WTasyn6merOnLamp + WTasyn{Cytosol} -> WTasyn7merOnLamp | $k_{WTasyn7merLampForm}$       | $k_{OligomerForm}$ |
| Formation of WT ASYN 8mer on Lamp2a                        | WTasyn8merFormOnLamp      | WTasyn{Cytosol} + WTasyn7merOnLamp -> WTasyn8merOnLamp | $k_{WTasyn8merLampForm}$       | $k_{OligomerForm}$ |
| Formation of WT ASYN 9mer on Lamp2a                        | WTasyn9merFormOnLamp      | WTasyn{Cytosol} + WTasyn8merOnLamp -> WTasyn9merOnLamp | $k_{WTasyn9merLampForm}$       | $k_{OligomerForm}$ |
| Binding of modified WT ASYN on Lamp2a and inhibition of it | DopModWTasynCMAInhibition | Lamp2a + DopModWTasyn{Cytosol} -> DopModWTasynOnLamp   | $k_{DopModWTasynLampBind}$     |                    |
| Formation of modified ASYN Dimer on Lamp2a                 | DopWTasyn2merFormOnLamp   | WTasyn{Cytosol} + WTasyndegr -> WTasyn2degr            | $k_{DopModWTasyn2merFormLamp}$ | $k_{2merForm}$     |
| Formation of modified WT ASYN 3mer on Lamp2a               | DopWTasyn3merFormOnLamp   | WTasyn{Cytosol} + WTasyn2degr -> WTasyn3merOnLamp      | $k_{DopModWTasyn3merFormLamp}$ | $k_{OligomerForm}$ |

|                                               |                               |                                                           |                                |                          |
|-----------------------------------------------|-------------------------------|-----------------------------------------------------------|--------------------------------|--------------------------|
| Formation of modified WT ASYN 4mer on Lamp2a  | DopWTasyn4merFormOnLamp       | WTasyn{Cytosol} + WTasyn3merOnLamp -> WTasyn4merOnLamp    | $k_{DopModWTasyn4merFormLamp}$ | $k_{OligomerForm}$       |
| Formation of modified WT ASYN 5mer on Lamp2a  | DopWTasyn5merFormOnLamp       | WTasyn{Cytosol} + WTasyn4merOnLamp -> WTasyn5merOnLamp    | $k_{DopModWTasyn5merFormLamp}$ | $k_{OligomerForm}$       |
| Formation of modified WT ASYN 6mer on Lamp2a  | DopWTasyn6merFormOnLamp       | WTasyn5merOnLamp + WTasyn{Cytosol} -> WTasyn6merOnLamp    | $k_{DopModWTasyn6merFormLamp}$ | $k_{OligomerForm}$       |
| Formation of modified ASYN 7mer on Lamp2a     | DopWTasyn7merFormOnLamp       | WTasyn6merOnLamp + WTasyn{Cytosol} -> WTasyn7merOnLamp    | $k_{DopModWTasyn7merFormLamp}$ | $k_{OligomerForm}$       |
| Formation of modified ASYN 8mer on Lamp2a     | DopWTasyn8merFormOnLamp       | WTasyn{Cytosol} + WTasyn7merOnLamp -> WTasyn8merOnLamp    | $k_{DopModWTasyn8merFormLamp}$ | $k_{OligomerForm}$       |
| Formation of modified ASYN 9mer on Lamp2a     | WTasyn9merFormOnLamp          | WTasyn{Cytosol} + WTasyn8merOnLamp -> WTasyn9merOnLamp    | $k_{DopModWTasyn9merFormLamp}$ | $k_{OligomerForm}$       |
| <b>Macroautophagy component</b>               |                               |                                                           |                                |                          |
| WT ASYN Monomer uptake from the autophagosome | AutophagosomeUptakeWTasyn     | WTasyn{Cytosol} -> WTasyn{M/autophagy&OtherLysDegrPath}   | $k_{WTasynAutophUptk}$         | $k_{OligAutophagUptake}$ |
| WT ASYN Dimer uptake from the autophagosome   | AutophagosomeUptakeWTasyn2mer | WTasyn2{Cytosol} -> WTasyn2{M/autophagy&OtherLysDegrPath} | $k_{WTasyn2merAutophUptk}$     | $k_{OligAutophagUptake}$ |



|                                                        |                                |                                                                       |                            |                          |
|--------------------------------------------------------|--------------------------------|-----------------------------------------------------------------------|----------------------------|--------------------------|
| WT ASYN 3mer uptake from the autophagosome             | AutophagosomeUptakeWT asyn3mer | WTasyn3{Cytosol} -> WTasyn3{M/autophagy&OtherLysDegrPath}             | $k_{WTasyn3merAutophUptk}$ | $k_{OligAutophagUptake}$ |
| WT ASYN 4mer uptake from the autophagosome             | AutophagosomeUptakeWT asyn4mer | WTasyn4{Cytosol} -> WTasyn4{M/autophagy&OtherLysDegrPath}             | $k_{WTasyn4merAutophUptk}$ | $k_{OligAutophagUptake}$ |
| WT ASYN 5mer uptake from the autophagosome             | AutophagosomeUptakeWT asyn5mer | WTasyn5{Cytosol} -> WTasyn5{M/autophagy&OtherLysDegrPath}             | $k_{WTasyn5merAutophUptk}$ | $k_{OligAutophagUptake}$ |
| WT ASYN 6mer uptake from the autophagosome             | AutophagosomeUptakeWT asyn6mer | WTasyn6{Cytosol} -> WTasyn6{M/autophagy&OtherLysDegrPath}             | $k_{WTasyn6merAutophUptk}$ | $k_{OligAutophagUptake}$ |
| WT ASYN 7mer uptake from the autophagosome             | AutophagosomeUptakeWT asyn7mer | WTasyn7{Cytosol} -> WTasyn7{M/autophagy&OtherLysDegrPath}             | $k_{WTasyn7merAutophUptk}$ | $k_{OligAutophagUptake}$ |
| WT ASYN 8mer uptake from the autophagosome             | AutophagosomeUptakeWT asyn8mer | WTasyn8{Cytosol} -> WTasyn8{M/autophagy&OtherLysDegrPath}             | $k_{WTasyn8merAutophUptk}$ | $k_{OligAutophagUptake}$ |
| Modified WT ASYN Monomer uptake from the autophagosome | DopModAutophagosomeUptake      | DopModWTasyn{Cytosol} -> DopModWTasyn{M/autophagy&OtherLysDegrPath}   | $k_{DopModAutophUptk}$     | $k_{OligAutophagUptake}$ |
| Modified WT ASYN Dimer uptake from the autophagosome   | DopModAutophagosomeUptake2mer  | DopModWTasyn2{Cytosol} -> DopModWTasyn2{M/autophagy&OtherLysDegrPath} | $k_{DopMod2merAutophUptk}$ | $k_{OligAutophagUptake}$ |
| Modified WT ASYN 3mer                                  | DopModAutophagosomeU           | DopModWTasyn3{Cytosol} ->                                             | $k_{DopMod3merAutophUptk}$ | $k_{OligAutophagUptake}$ |

|                                                     |                               |                                                                       |                            |                          |
|-----------------------------------------------------|-------------------------------|-----------------------------------------------------------------------|----------------------------|--------------------------|
| uptake from the autophagosome                       | ptake3mer                     | DopModWTasyn3{M/autophagy&OtherLysDegrPath}                           |                            |                          |
| Modified WT ASYN 4mer uptake from the autophagosome | DopModAutophagosomeUptake4mer | DopModWTasyn4{Cytosol} -> DopModWTasyn4{M/autophagy&OtherLysDegrPath} | $k_{DopMod4merAutophUptk}$ | $k_{OligAutophagUptake}$ |
| Modified WT ASYN 5mer uptake from the autophagosome | DopModAutophagosomeUptake5mer | DopModWTasyn5{Cytosol} -> DopModWTasyn5{M/autophagy&OtherLysDegrPath} | $k_{DopMod5merAutophUptk}$ | $k_{OligAutophagUptake}$ |
| Modified WT ASYN 6mer uptake from the autophagosome | DopModAutophagosomeUptake6mer | DopModWTasyn6{Cytosol} -> DopModWTasyn6{M/autophagy&OtherLysDegrPath} | $k_{DopMod6merAutophUptk}$ | $k_{OligAutophagUptake}$ |
| Modified WT ASYN 7mer uptake from the autophagosome | DopModAutophagosomeUptake7mer | DopModWTasyn7{Cytosol} -> DopModWTasyn7{M/autophagy&OtherLysDegrPath} | $k_{DopMod7merAutophUptk}$ | $k_{OligAutophagUptake}$ |
| Modified WT ASYN 8mer uptake from the autophagosome | DopModAutophagosomeUptake8mer | DopModWTasyn8{Cytosol} -> DopModWTasyn8{M/autophagy&OtherLysDegrPath} | $k_{DopMod8merAutophUptk}$ | $k_{OligAutophagUptake}$ |
| Degradation of WT ASYN monomer from macroautophagy  | M/autophagyWTasyn1Degr        | WTasyn{M/autophagy&OtherLysDegrPath} -> WTasynmerM/Adegr              | $k_{WTasynM/Adegr}$        | $k_{M/autophagyDegr}$    |
| WT ASYN Dimer degradation by macroautophagy         | M/autophagyWTasyn2Degr        | WTasyn2{M/autophagy&OtherLysDegrPath} -> WTasyn2merM/Adegr            | $k_{WTasyn2merM/Adegr}$    | $k_{M/autophagyDegr}$    |
| WT ASYN 3mer degradation by macroautophagy          | M/autophagyWTasyn3Degr        | WTasyn3{M/autophagy&OtherLysDegrPath} -> WTasyn3merM/Adegr            | $k_{WTasyn3merM/Adegr}$    | $k_{M/autophagyDegr}$    |

|                                                             |                              |                                                                        |                         |                       |
|-------------------------------------------------------------|------------------------------|------------------------------------------------------------------------|-------------------------|-----------------------|
| WT ASYN 4mer degradation by macroautophagy                  | M/autophagyWTasyn4Degr       | WTasyn4{M/autophagy&OtherLysDegrPath} -> WTasyn4merM/Adegr             | $k_{WTasyn4merM/ADegr}$ | $k_{M/autophagyDegr}$ |
| WT ASYN 5mer degradation by macroautophagy                  | M/autophagyWTasyn5Degr       | WTasyn5{M/autophagy&OtherLysDegrPath} -> WTasyn5merM/Adegr             | $k_{WTasyn5merM/ADegr}$ | $k_{M/autophagyDegr}$ |
| WT ASYN 6mer degradation by macroautophagy                  | M/autophagyWTasyn6Degr       | WTasyn6{M/autophagy&OtherLysDegrPath} -> WTasyn6merM/Adegr             | $k_{WTasyn6merM/ADegr}$ | $k_{M/autophagyDegr}$ |
| WT ASYN 7mer degradation by macroautophagy                  | M/autophagyWTasyn7Degr       | WTasyn7{M/autophagy&OtherLysDegrPath} -> WTasyn7merM/Adegr             | $k_{WTasyn7merM/ADegr}$ | $k_{M/autophagyDegr}$ |
| WT ASYN 8mer degradation by macroautophagy                  | M/autophagyWTasyn8Degr       | WTasyn8{M/autophagy&OtherLysDegrPath} -> WTasyn8merM/Adegr             | $k_{WTasyn8merM/ADegr}$ | $k_{M/autophagyDegr}$ |
| Degradation of modified WT ASYN monomer from macroautophagy | M/autophagyDopModWTasyn1Degr | DopModWTasyn{M/autophagy&OtherLysDegrPath} -> DopModWTasyn1merM/Adegr  | $k_{DopModM/ADegr}$     | $k_{M/autophagyDegr}$ |
| Degradation of modified WT ASYN Dimer from macroautophagy   | M/autophagyDopModWTasyn2Degr | DopModWTasyn2{M/autophagy&OtherLysDegrPath} -> DopModWTasyn2merM/Adegr | $k_{DopMod2merM/ADegr}$ | $k_{M/autophagyDegr}$ |
| Degradation of modified WT ASYN 3mer from macroautophagy    | M/autophagyDopModWTasyn3Degr | DopModWTasyn3{M/autophagy&OtherLysDegrPath} -> DopModWTasyn3merM/Adegr | $k_{DopMod3merM/ADegr}$ | $k_{M/autophagyDegr}$ |
| Degradation of modified WT ASYN 4mer from macroautophagy    | M/autophagyDopModWTasyn4Degr | DopModWTasyn4{M/autophagy&OtherLysDegrPath} -> DopModWTasyn4merM/Adegr | $k_{DopMod4merM/ADegr}$ | $k_{M/autophagyDegr}$ |
| Degradation of modified WT ASYN 5mer from                   | M/autophagyDopModWTasyn5Degr | DopModWTasyn5{M/autophagy&OtherLysDegrPath} ->                         | $k_{DopMod5merM/ADegr}$ | $k_{M/autophagyDegr}$ |

|                                                          |                              |                                                                        |                          |                       |
|----------------------------------------------------------|------------------------------|------------------------------------------------------------------------|--------------------------|-----------------------|
| macroautophagy                                           |                              | DopModWTasyn6merM/Adegr                                                |                          |                       |
| Degradation of modified WT ASYN 6mer from macroautophagy | M/autophagyDopModWTasyn6Degr | DopModWTasyn6{M/autophagy&OtherLysDegrPath} -> DopModWTasyn7merM/Adegr | $k_{DopMod6merM/Adegr}$  | $k_{M/autophagyDegr}$ |
| Degradation of modified WT ASYN 7mer from macroautophagy | M/autophagyDopModWTasyn7Degr | DopModWTasyn7{M/autophagy&OtherLysDegrPath} -> DopModWTasyn7merM/Adegr | $k_{DopMod7merM/Adegr}$  | $k_{M/autophagyDegr}$ |
| Degradation of modified WT ASYN 8mer from macroautophagy | M/autophagyDopModWTasyn8Degr | DopModWTasyn8{M/autophagy&OtherLysDegrPath} -> DopModWTasyn8merM/Adegr | $k_{DopMod8merM/Adegr}$  | $k_{M/autophagyDegr}$ |
| <b>Proteasome component</b>                              |                              |                                                                        |                          |                       |
| Binding of WT ASYN 3mer with the proteasome              | 3merProtBind                 | WTasyn3{Cytosol} + Proteasome -> ProtWTasyn3                           | $k_{WTasyn3merProtBind}$ | $k_{ProteasomeBind}$  |
| Binding of WT ASYN 4mer with the proteasome              | 4merProtBind                 | WTasyn4{Cytosol} + Proteasome -> ProtWTasyn4                           | $k_{WTasyn4merProtBind}$ | $k_{ProteasomeBind}$  |
| Binding of WT ASYN 5mer with the proteasome              | 5merProtBind                 | WTasyn5{Cytosol} + Proteasome -> ProtWTasyn5                           | $k_{WTasyn5merProtBind}$ | $k_{ProteasomeBind}$  |
| Binding of WT ASYN 6mer with the proteasome              | 6merProtBind                 | WTasyn6{Cytosol} + Proteasome -> ProtWTasyn6                           | $k_{WTasyn6merProtBind}$ | $k_{ProteasomeBind}$  |
| Binding of WT ASYN 7mer with the proteasome              | 7merProtBind                 | WTasyn7{Cytosol} + Proteasome -> ProtWTasyn7                           | $k_{WTasyn7merProtBind}$ | $k_{ProteasomeBind}$  |
| Binding of WT ASYN 8mer with the proteasome              | 8merProtBind                 | WTasyn8{Cytosol} + Proteasome -> ProtWTasyn8                           | $k_{WTasyn8merProtBind}$ | $k_{ProteasomeBind}$  |

|                                                      |                        |                                                          |                          |                      |
|------------------------------------------------------|------------------------|----------------------------------------------------------|--------------------------|----------------------|
| Binding of WT ASYN 9mer with the proteasome          | 9merProtBind           | WTasyn9 + Proteasome -> ProtWTasyn9                      | $k_{WTasyn9merProtBind}$ | $k_{ProteasomeBind}$ |
| Binding of modified WT ASYN 3mer with the proteasome | DopMod3merProtBind     | DopModWTasyn3{Cytosol} + Proteasome -> ProtDopModWTasyn3 | $k_{DopMod3merProtBind}$ | $k_{ProteasomeBind}$ |
| Binding of modified WT ASYN 4mer with the proteasome | DopMod4merProtBind     | DopModWTasyn4{Cytosol} + Proteasome -> ProtDopModWTasyn4 | $k_{DopMod4merProtBind}$ | $k_{ProteasomeBind}$ |
| Binding of modified WT ASYN 5mer with the proteasome | DopMod5merProtBind     | DopModWTasyn5{Cytosol} + Proteasome -> ProtDopModWTasyn5 | $k_{DopMod5merProtBind}$ | $k_{ProteasomeBind}$ |
| Binding of modified WT ASYN 6mer with the proteasome | DopMod6merProtBind     | DopModWTasyn6{Cytosol} + Proteasome -> ProtDopModWTasyn6 | $k_{DopMod6merProtBind}$ | $k_{ProteasomeBind}$ |
| Binding of modified WT ASYN 7mer with the proteasome | DopMod7merProtBind     | DopModWTasyn7{Cytosol} + Proteasome -> ProtDopModWTasyn7 | $k_{DopMod7merProtBind}$ | $k_{ProteasomeBind}$ |
| Binding of modified WT ASYN 8mer with the proteasome | DopMod8merProtBind     | DopModWTasyn8{Cytosol} + Proteasome -> ProtDopModWTasyn8 | $k_{DopMod8merProtBind}$ | $k_{ProteasomeBind}$ |
| Binding of modified WT ASYN 9mer with the proteasome | DopMod9merProtBind     | DopModWTasyn9 + Proteasome -> ProtDopModWTasyn9          | $k_{DopMod9merProtBind}$ | $k_{ProteasomeBind}$ |
| Binding of HMW species with the proteasome           | WTasynHigherSPCprotInh | HigherWTasynSPC + Proteasome -> ProtWTasynHigherSPC      | $k_{WTasynHighProtBind}$ | $k_{ProteasomeBind}$ |
| Degradation of WT ASYN 3mer from the proteasome      | ProtFree3merWT         | ProtWTasyn3 -> Proteasome                                | $k_{WTasyn3merProtFree}$ | $k_{ProtOligDegr}$   |
| Degradation of WT ASYN 4mer from the proteasome      | ProtFree4merWT         | ProtWTasyn4 -> Proteasome                                | $k_{WTasyn4merProtFree}$ | $k_{ProtOligDegr}$   |
| Degradation of WT ASYN 5mer                          | ProtFree5merWT         | ProtWTasyn5 -> Proteasome                                | $k_{WTasyn5merProtFree}$ | $k_{ProtOligDegr}$   |

|                                                          |                   |                                 |                          |                    |
|----------------------------------------------------------|-------------------|---------------------------------|--------------------------|--------------------|
| from the proteasome                                      |                   |                                 |                          |                    |
| Degradation of WT ASYN 6mer from the proteasome          | ProtFree6merWT    | ProtWTasyn6 -> Proteasome       | $k_{WTasyn6merProtFree}$ | $k_{ProtOligDegr}$ |
| Degradation of WT ASYN 7mer from the proteasome          | ProtFree7merWT    | ProtWTasyn7 -> Proteasome       | $k_{WTasyn7merProtFree}$ | $k_{ProtOligDegr}$ |
| Degradation of WT ASYN 8mer from the proteasome          | ProtFree8merWT    | ProtWTasyn8 -> Proteasome       | $k_{WTasyn8merProtFree}$ | $k_{ProtOligDegr}$ |
| Degradation of WT ASYN 9mer from the proteasome          | ProtFree9merWT    | ProtWTasyn9 -> Proteasome       | $k_{WTasyn9merProtFree}$ | $k_{ProtOligDegr}$ |
| Degradation of modified WT ASYN 3mer from the proteasome | ProtFree3merDopWT | ProtDopModWTasyn3 -> Proteasome | $k_{DopMod3merProtFree}$ | $k_{ProtOligDegr}$ |
| Degradation of modified WT ASYN 4mer from the proteasome | ProtFree4merDopWT | ProtDopModWTasyn4 -> Proteasome | $k_{DopMod4merProtFree}$ | $k_{ProtOligDegr}$ |
| Degradation of modified WT ASYN 5mer from the proteasome | ProtFree5merDopWT | ProtDopModWTasyn5 -> Proteasome | $k_{DopMod5merProtFree}$ | $k_{ProtOligDegr}$ |
| Degradation of modified WT ASYN 6mer from the proteasome | ProtFree6merDopWT | ProtDopModWTasyn6 -> Proteasome | $k_{DopMod6merProtFree}$ | $k_{ProtOligDegr}$ |
| Degradation of modified WT ASYN 7mer from the proteasome | ProtFree7merDopWT | ProtDopModWTasyn7 -> Proteasome | $k_{DopMod7merProtFree}$ | $k_{ProtOligDegr}$ |

|                                                          |                   |                                 |                          |                    |
|----------------------------------------------------------|-------------------|---------------------------------|--------------------------|--------------------|
| Degradation of modified WT ASYN 8mer from the proteasome | ProtFree8merDopWT | ProtDopModWTasyn8 -> Proteasome | $k_{DopMod8merProtFree}$ | $k_{ProtOligDegr}$ |
| Degradation of modified WT ASYN 9mer from the proteasome | ProtFree9merDopWT | ProtDopModWTasyn9 -> Proteasome | $k_{DopMod9merProtFree}$ | $k_{ProtOligDegr}$ |
