# Supplementary material for: In silico modeling of the effects of alpha-synuclein oligomerization on dopaminergic neuronal homeostasis
Source: PubMed Central journal article supplement (PMC4062111; doi:10.1186/1752-0509-8-54), 2014-05-13
Supplement: 1752-0509-8-54-S5.pdf [file 1752-0509-8-54-S5.pdf]

**Table 1: Initial and final values of kinetic parameters estimated by the Particles Swarm parameter estimation algorithm in COPASI**

| Parameter Name               | Reference Values (starting point for Manual Empirical-preparatory Tuning) | Initial Value for parameter estimation (after Manual Empirical-preparatory Tuning) | Margins                     | Estimated value (by global stochastic optimization) |
|------------------------------|---------------------------------------------------------------------------|------------------------------------------------------------------------------------|-----------------------------|-----------------------------------------------------|
| $k_{WTasyn2merForm}$         | 5e-12 [1]                                                                 | 6.89778e-10                                                                        | [6.89778e-12 , 6.89778e-08] | 1.46294e-09                                         |
| $k_{OligomerForm}$           | 5e-10 [1]                                                                 | 8.1732e-09                                                                         | [8.1732e-11 , 8.1732e-07]   | 3.3505e-08                                          |
| $k_{ProteasomeBind}$         | 1.7e-09 [1]                                                               | 1.7e-09                                                                            | [1.7e-11 , 1.7e-07]         | 3.42469e-09                                         |
| $k_{OligAutophagUptake}$     | 4e-08 [1]                                                                 | 2.38913e-06                                                                        | [2.38913e-08 , 2.38913e-04] | 2.39034e-08                                         |
| $k_{LampFreeWTasyn}$         | 0.001 [1]                                                                 | 0.001                                                                              | [0.0001 , 0.01]             | 0.000304457                                         |
| $k_{ProtOligDegr}$           | 1e-02 [1]                                                                 | 3.70096e-05                                                                        | [3.70096e-06 , 3.70096e-04] | 0.000370096                                         |
| $k_{WTasyn1_2merBindOnLamp}$ | 4e-08 [1]                                                                 | 4e-08                                                                              | [4e-10 , 4e-06]             | 6.86546e-07                                         |
| $k_{WToligoBindOnLamp}$      | 4e-08 [1]                                                                 | 4e-08                                                                              | [4e-10 , 4e-06]             | 4e-06                                               |
| $k_{DisRate}$                | 5e-09 [1]                                                                 | 5e-09                                                                              | [5e-11 , 5e-07]             | 4.99953e-07                                         |
| $k_{DopModWTasynLampBind}$   | 4.8e-08 [1,2]                                                             | 8.268e-08                                                                          | [8.268e-10 , 8.268e-06]     | 7.6716e-09                                          |
| $k_{WTasynSynth}$            | 2.8e-02 [1]                                                               | 0.011908                                                                           | [0.0011908 , 0.11908]       | 0.0294219                                           |
| $k_{DopProd}$                | 2.0e-05 [1]                                                               | 0.01                                                                               | [0.001 , 0.1]               | 0.0791823                                           |
| $k_{WTasynDopMod}$           | 5e-08 [1]                                                                 | 5e-08                                                                              | [5e-10 , 5e-10]             | 6.74768e-07                                         |
| $k_{DopDegr}$                | 0.001 [1]                                                                 | 0.001                                                                              | [0.0001 , 0.01]             | 0.00679501                                          |
| $k_{AggrGrowth}$             | 5e-09 [1]                                                                 | 5e-09                                                                              | [5e-11 , 5e-07]             | 4.90556e-07                                         |
| $k_{WTasynLysUptk}$          | 0.001 [1]                                                                 | 0.001                                                                              | [0.0001 , 0.01]             | 0.00999558                                          |
| $k_{WTasyn2LysUptk}$         | 0.001 [1]                                                                 | 0.001                                                                              | [0.0001 , 0.01]             | 0.00995312                                          |

1. Proctor CJ, Tangeman PJ, Ardley HC: **Modelling the role of UCH-L1 on protein aggregation in age-related neurodegeneration**. *Plos One* 2010, **5**:e13175.

2. Martinez-Vicente M, Tallochy Z, Kaushik S, Massey AC, Mazzulli J, Mosharov EV, Hodara R, Fredenburg R, Wu D-C, Follenzi A, Dauer W, Przedborski S, Ischiropoulos H, Lansbury PT, Sulzer D, Cuervo AM: **Dopamine-modified alpha-synuclein blocks chaperone-mediated autophagy**. *J Clin Invest* 2008, **118**:777–788.

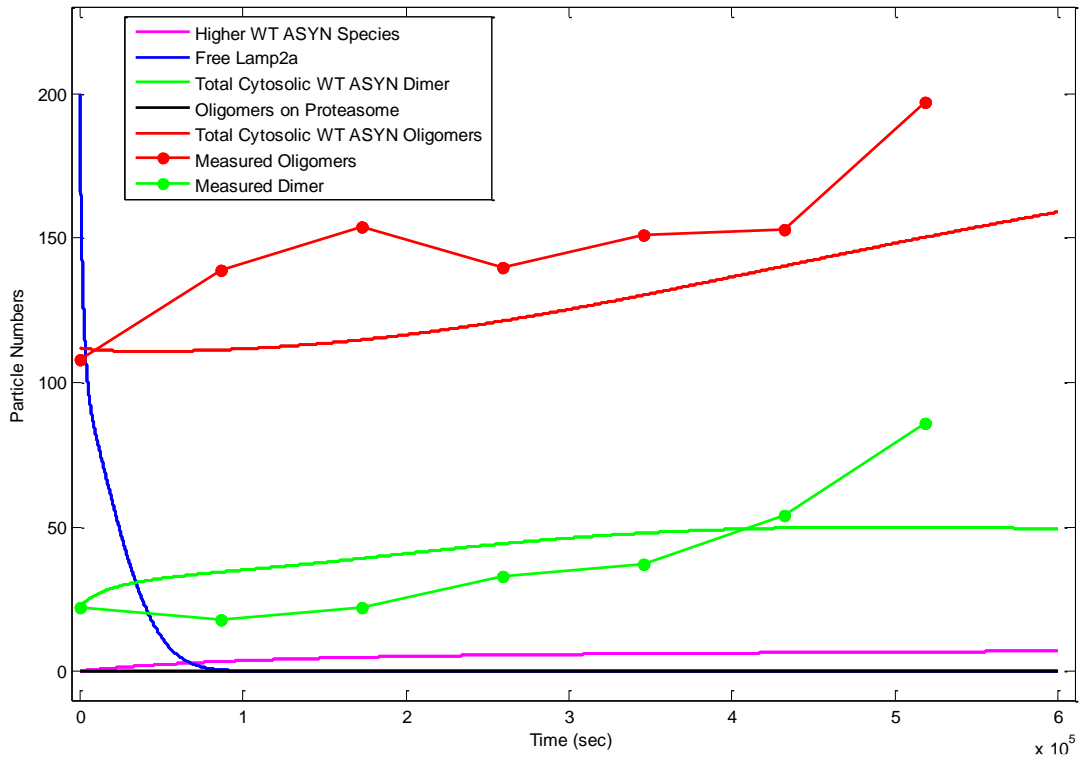

Figure 1: Model simulation results using parameter values estimated by Genetic Algorithm.

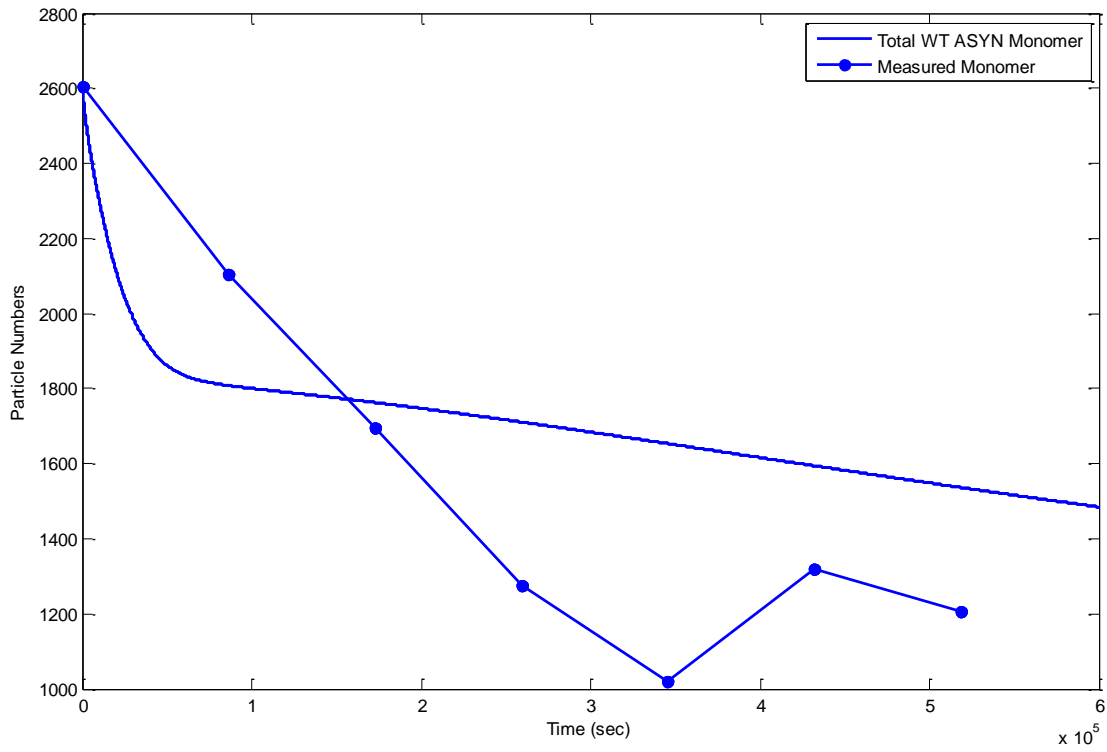

Figure 2: Model simulation results for the monomeric ASYN using parameter values estimated by Genetic Algorithm.

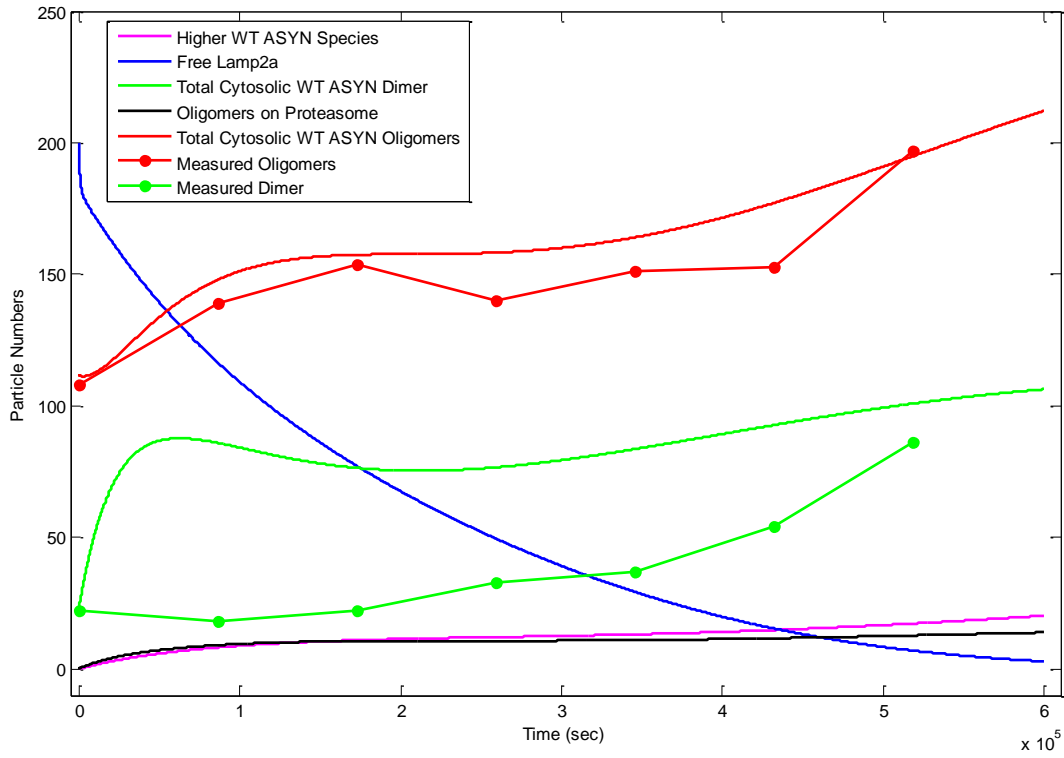

Figure 3: Model simulation results using parameter values estimated by Genetic Algorithm with Stochastic Ranking.

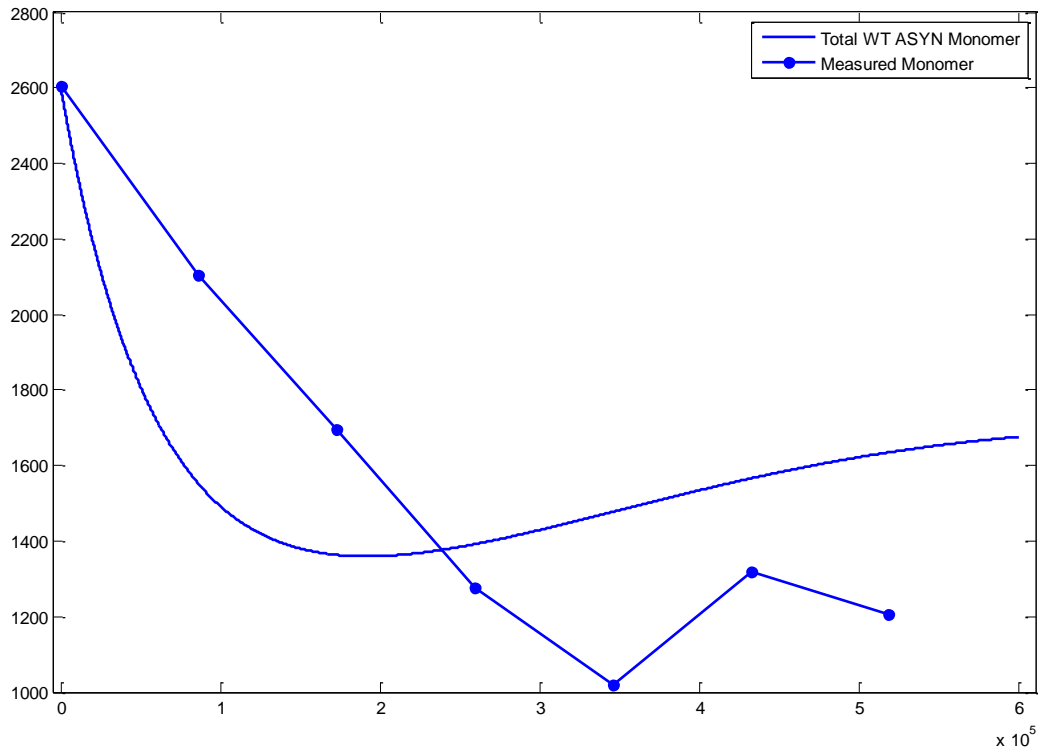

Figure 4: Model simulation results for the monomeric ASYN using parameter values estimated by Genetic Algorithm with Stochastic Ranking.

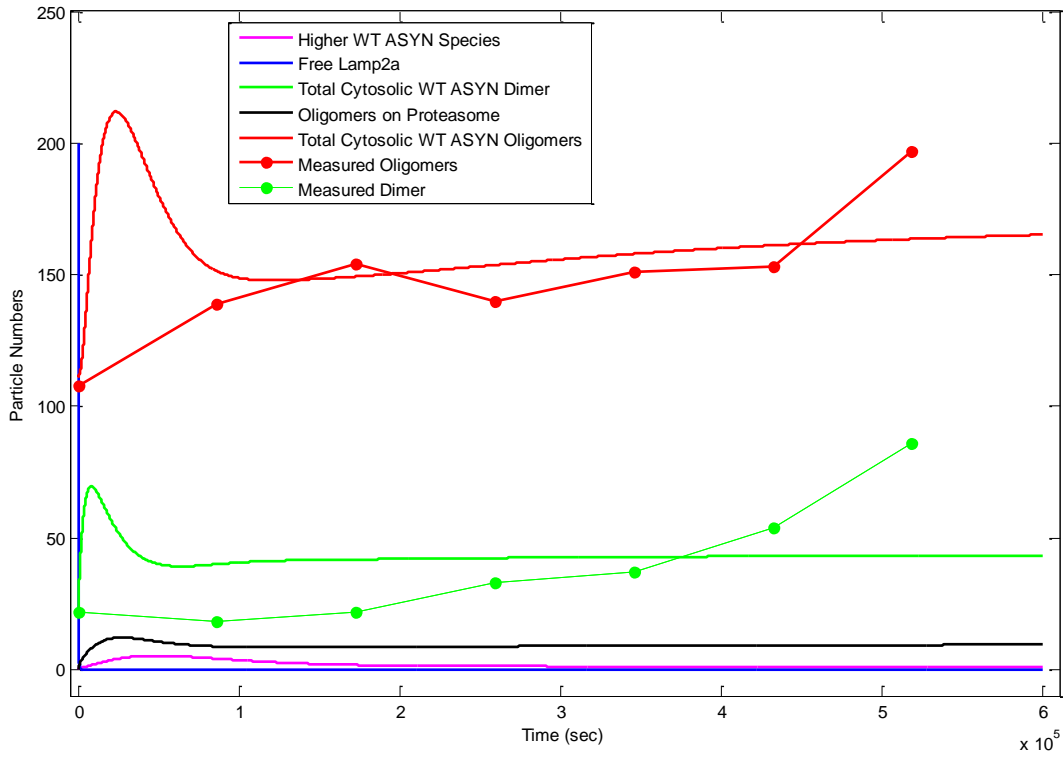

Figure 5: Model simulation results using parameter values estimated by Evolution Strategy algorithm (SRES).

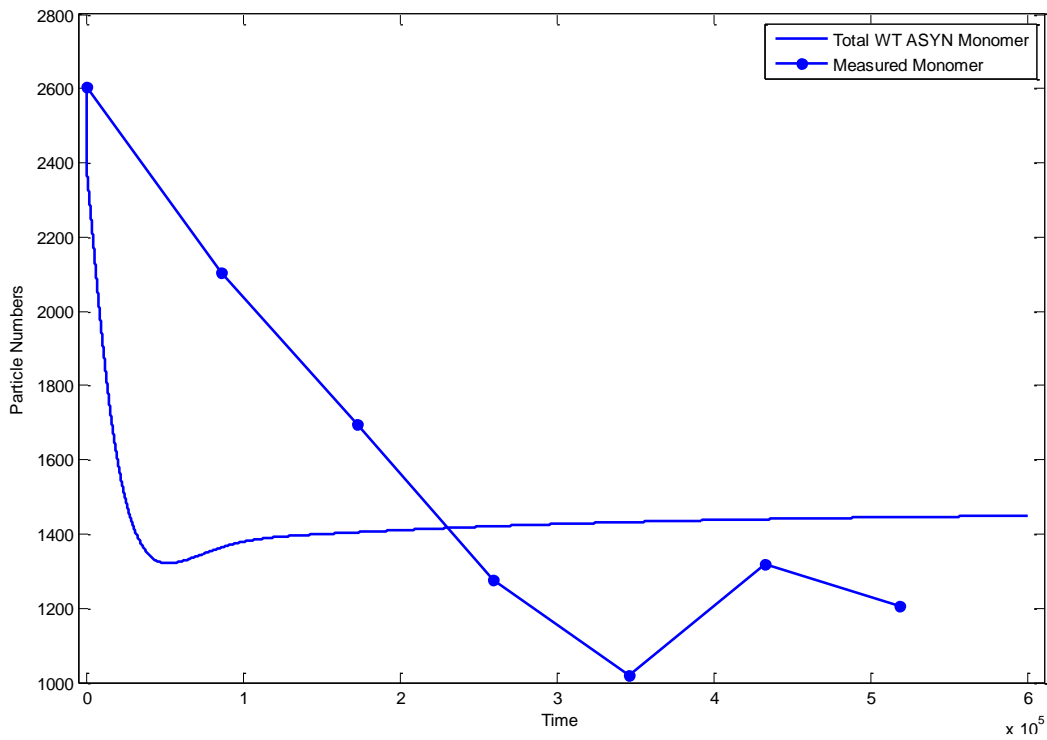

Figure 6: Model simulation results for the monomeric ASYN using parameter values estimated by Evolution Strategy algorithm (SRES).

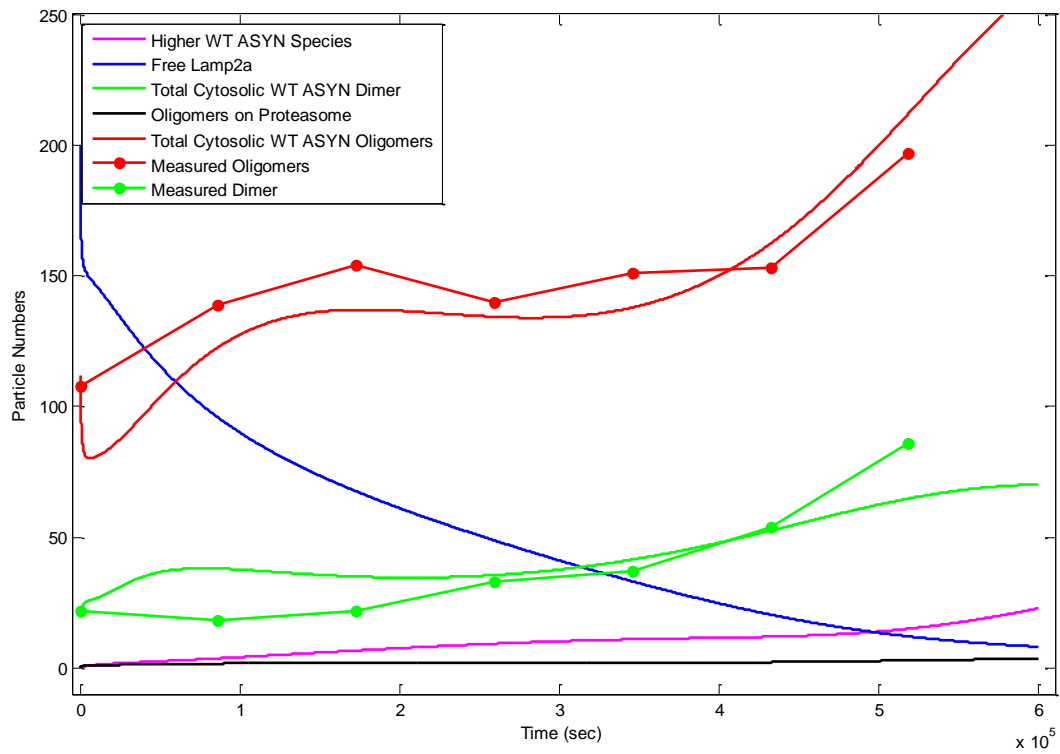

Figure 7: Model simulation results using parameter values estimated by Particle Swarm algorithm.

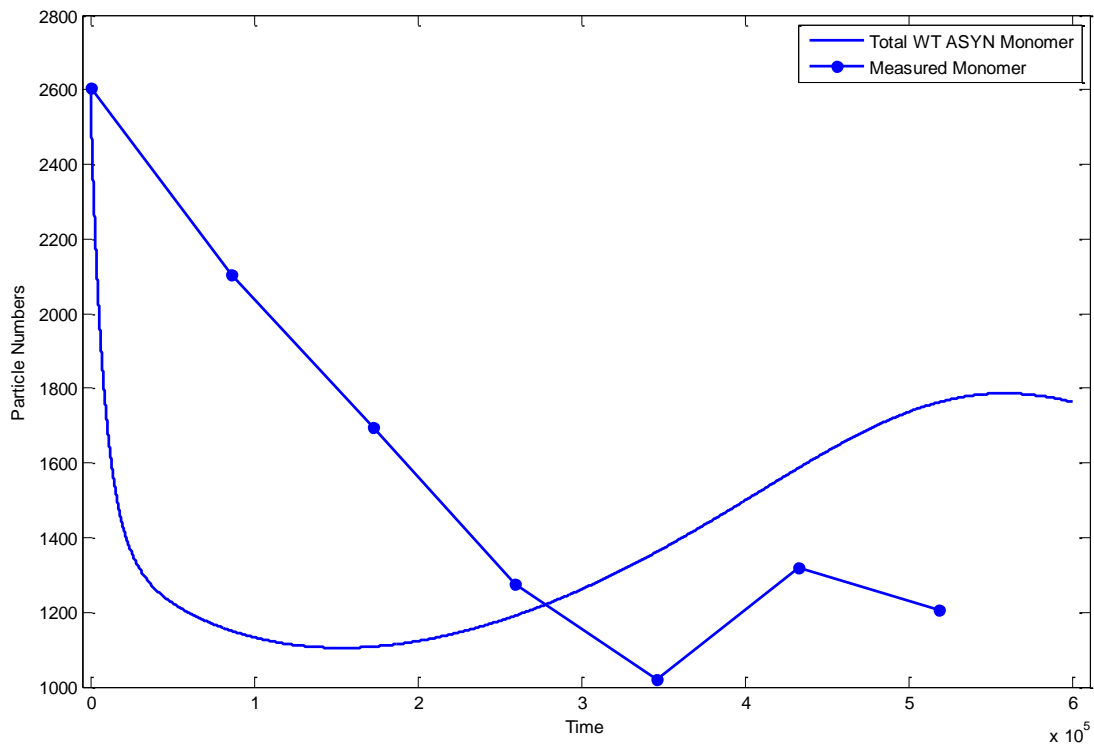

Figure 8: Model simulation results for the monomeric ASYN using parameter values estimated by Particle Swarm algorithm.
