# Supplementary material for: In silico modeling of the effects of alpha-synuclein oligomerization on dopaminergic neuronal homeostasis
Source: PubMed Central journal article supplement (PMC4062111; doi:10.1186/1752-0509-8-54), 2014-05-13
Supplement: 1752-0509-8-54-S6.pdf [file 1752-0509-8-54-S6.pdf]

**Table 1: Sensitivity Analysis Results**

| Parameter Name               | Sensitivity values (scaled sensitivities)     |                                              |                                                         |
|------------------------------|-----------------------------------------------|----------------------------------------------|---------------------------------------------------------|
|                              | Criterion I: Total levels of WT ASYN monomers | Criterion II: Total levels of WT ASYN dimers | Criterion III: Total sum of WT ASYN oligomers (3-9mers) |
| $k_{WTasynSynth}$            | 0,574409000000                                | 0,767473000000                               | 1,350560000000                                          |
| $k_{WTasynDopMod}$           | 0,156937000000                                | 0,588037000000                               | 0,363216000000                                          |
| $k_{WTasyn2merForm}$         | 0,141511000000                                | 0,169186000000                               | 0,331771000000                                          |
| $k_{DopProd}$                | 0,050302000000                                | 0,156937000000                               | 0,241671000000                                          |
| $k_{DopModWTasynLampBind}$   | 0,041930100000                                | 0,110639000000                               | 0,231894000000                                          |
| $k_{WTOligoBindOnLamp}$      | 0,002102700000                                | 0,058108900000                               | 0,00021177200                                           |
| $k_{DopModMADegr}$           | 0,000380270000                                | 0,003127600000                               | 0,00000337801                                           |
| $k_{WTasyn2merLysDegr}$      | 0,000267912000                                | 0,000432264000                               | -0,00000162136                                          |
| $k_{WTasynLysDegr}$          | 0,000267309000                                | 0,000415798000                               | -0,00000309348                                          |
| $k_{DisRate}$                | 0,000173683000                                | 0,000383557000                               | -0,00002257980                                          |
| $k_{DopMod2merMADegr}$       | 0,000001971630                                | 0,000124558000                               | -0,00002565350                                          |
| $k_{WTasyn2LysUptk}$         | -0,000000429457                               | 0,000006129670                               | -0,00018962200                                          |
| $k_{LampFreeWTasyn}$         | -0,000000792020                               | 0,000000388696                               | -0,00022365700                                          |
| $k_{WTasynLysUptk}$          | -0,000003158690                               | -0,000000438594                              | -0,00084612900                                          |
| $k_{ProtOligDegr}$           | -0,000265849000                               | -0,000014362700                              | -0,00252914000                                          |
| $k_{AggrGrowth}$             | -0,005391830000                               | -0,000382850000                              | -0,01124050000                                          |
| $k_{OligomerForm}$           | -0,006621620000                               | -0,007667180000                              | -0,18485500000                                          |
| $k_{WTasyn1_2merBindOnLamp}$ | -0,156613000000                               | -0,057112400000                              | -0,25235900000                                          |
| $k_{ProteasomeBind}$         | -0,161592000000                               | -0,214919000000                              | -0,29913200000                                          |
| $k_{DopDegr}$                | -0,168131000000                               | -0,359317000000                              | -0,36045800000                                          |
| $k_{OligAutophagUptake}$     | -0,336953000000                               | -0,980309000000                              | -0,84454700000                                          |
